# Supplementary figures and images for: Comparison of liver and plasma metabolic profiles in piglets of different ages as animal models for paediatric population
Source: Royal Society of Chemistry journal article supplement (doi:10.1039/d0an00254b), 2020-01-01

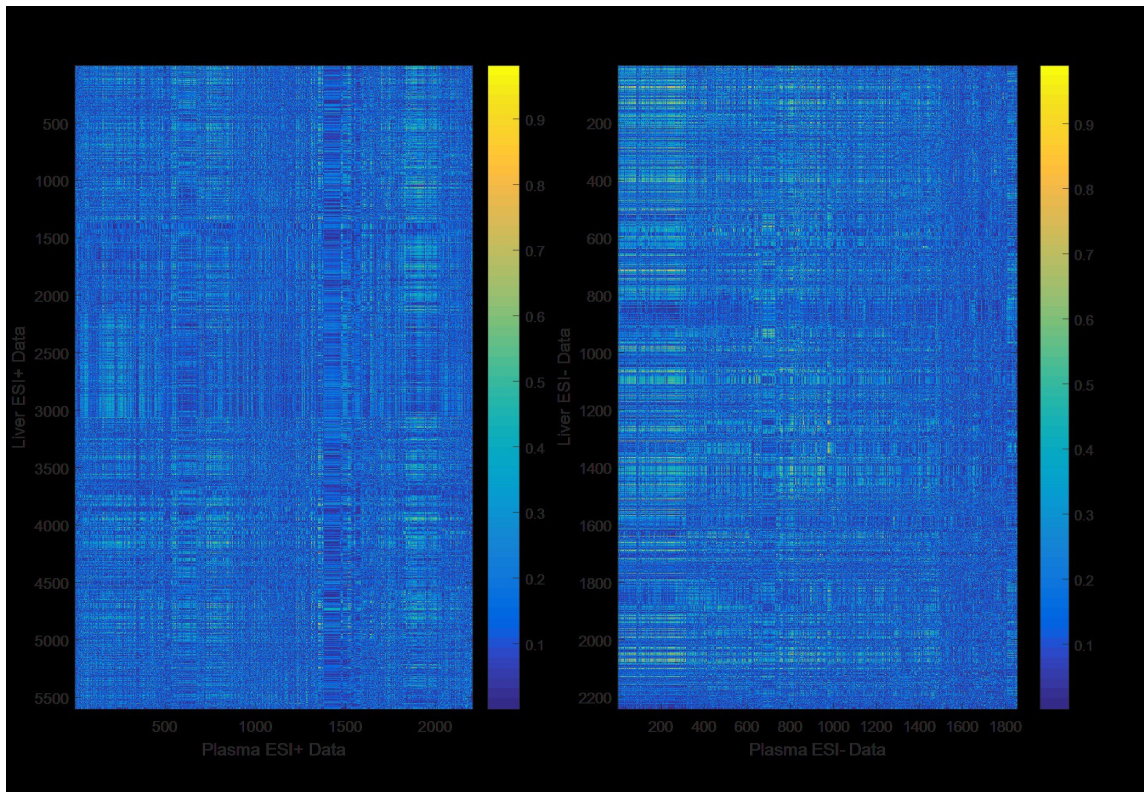

Supplement: d0an00254b3.pdf [file d0an00254b3.pdf]
